# Supplementary material for: Synthesis of degradable multi-segmented polymers via Michael-addition thiol–ene step-growth polymerization
Source: Royal Society of Chemistry journal article supplement (doi:10.1039/c5ra18861j), 2015-01-01
Supplement: c5ra18861j1.pdf [file c5ra18861j1.pdf]

## Supporting Information

# Synthesis of Degradable Multi-Segmented Polymers via Michael-Addition Thiol-Ene Step- Growth Polymerization

*Joke Vandenberg<sup>a</sup>, Gijs Ramakers,<sup>a</sup> Luk Van Lokeren,<sup>b</sup> Guy Van Assche<sup>b</sup> and Tanja  
Junkers<sup>a,c\*</sup>*

<sup>a</sup>Polymer Reaction Design Group, Institute for Materials Research (imo-imomec), Hasselt  
University, Campus Diepenbeek, Building D, B-3590 Diepenbeek, Belgium

<sup>b</sup>Physical Chemistry and Polymer Science, Department of Materials and Chemistry, Vrije  
Universiteit Brussel, Pleinlaan 2, B-1050 Brussels, Belgium

<sup>c</sup>IMEC division IMOMECE, Wetenschapspark 1, B-3590 Diepenbeek, Belgium

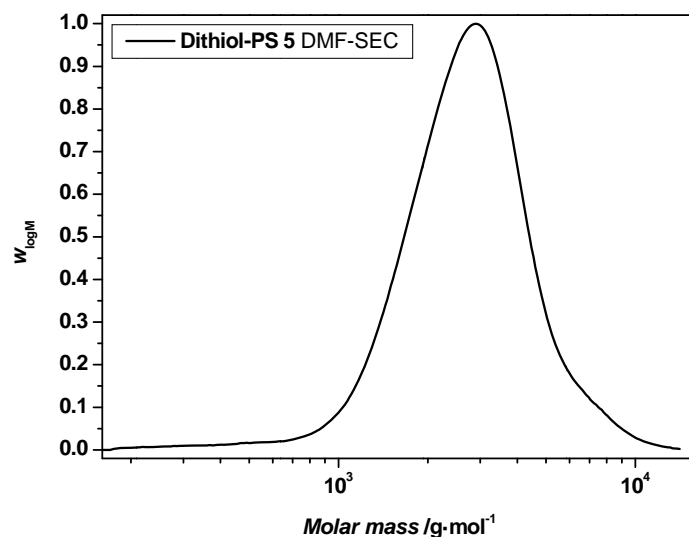

**Figure S1:** Molar mass distribution of **dithiol-PS 5** measured by DMF-SEC, displaying the absence of a disulfide-induced high molar mass shoulder in this particular solvent.

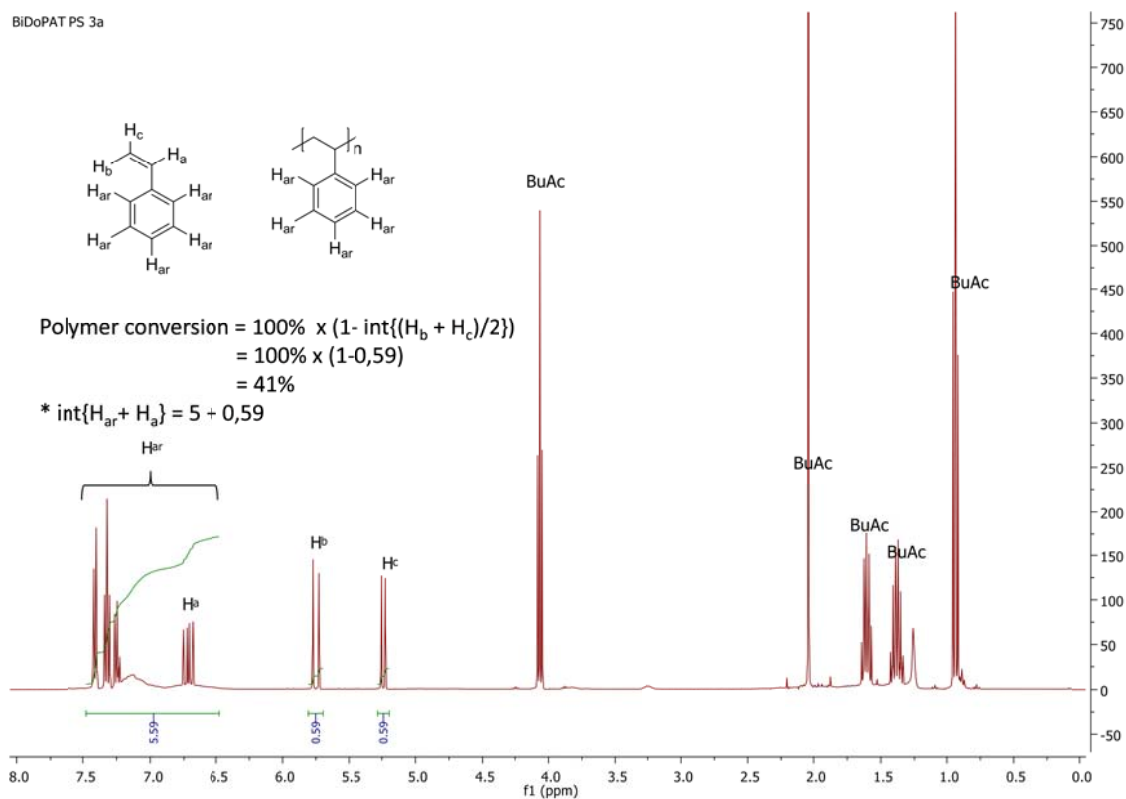

**Figure S2:**  $^1\text{H-NMR}$  spectra of **BiDoPAT-PS 3a**. The sample was measured right after polymerization before purification in order to determine polymer conversion. The NMR resonances marked with BuAc correspond to solvent peaks.

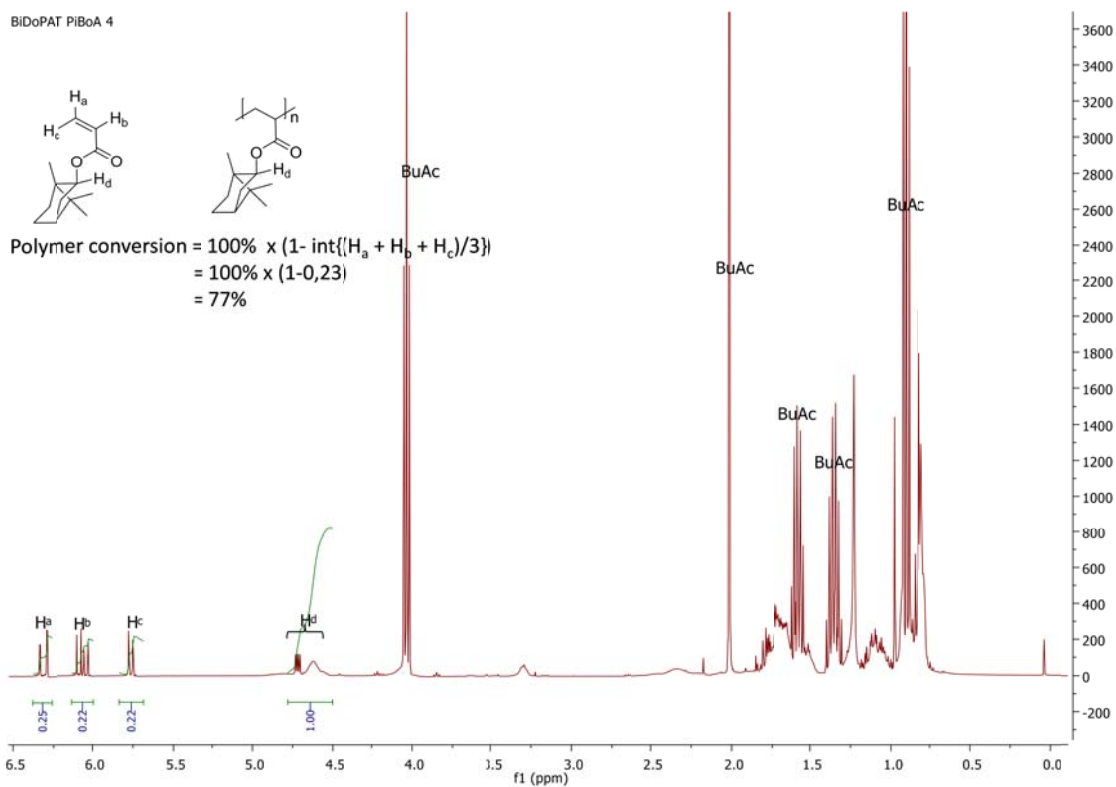

**Figure S3:**  $^1\text{H}$ -NMR spectra of **BiDoPAT-PiBoA 4**. The sample was measured right after polymerization before purification in order to determine polymer conversion. The NMR resonances marked with BuAc correspond to solvent peaks.

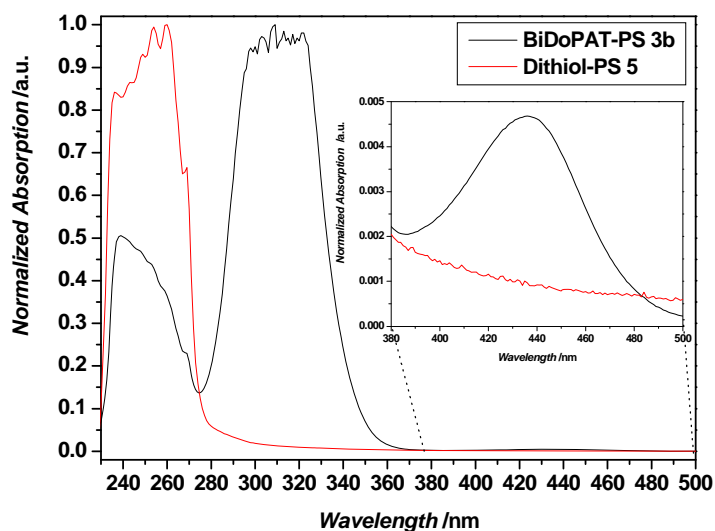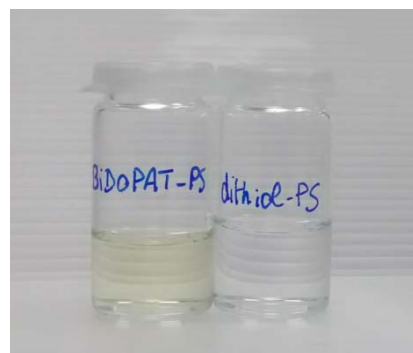

**Figure S4:** Normalized UV-Vis spectra of **BiDoPAT-PS 3b** and **dithiol-PS 5** and visible appearance of the products in THF.

**Table S1.** Table of masses for products identified in the mass spectra.

| Species                | Code | Charge | $m/z_{\text{exp}}$ | $m/z_{\text{theo}}$ | $\Delta m/z$ |
|------------------------|------|--------|--------------------|---------------------|--------------|
| <b>BiDoPAT-PiBoA 4</b> | ●    | single | 1818,06            | 1818,05             | 0,01         |
| <b>BiDoPAT-PiBoA 4</b> | ▲    | double | 1857,13            | 1857,18             | 0,05         |
| <b>Dithiol-PiBoA 6</b> | ○    | single | 1954,23            | 1954,22             | 0,12         |
| <b>Dithiol-PiBoA 6</b> | △    | double | 1821,18            | 1821,19             | 0,01         |
